# Supplementary material for: Thoracic and lumbar spine trauma classification systems fail to predict post-traumatic kyphotic deformity
Source: PubMed Central journal article supplement — N Am Spine Soc J. 2022 Jun 16;11:100134. doi: 10.1016/j.xnsj.2022.100134 (PMC9240640; doi:10.1016/j.xnsj.2022.100134), 2022-06-16
Supplement: mmc5.pdf [file mmc5.pdf]

## FDA Approval Status of Devices/Drugs

Article Title:

Manuscript reference #:

### FDA Approval Status

If a device or drug requiring FDA approval is identified as an important component of your article, you must indicate the FDA status for use as it will be discussed. Please list the name of the device(s) and drug(s) requiring FDA approval and check the appropriate status for use as it is discussed in the article.

My manuscript does not discuss any drugs or devices requiring FDA approval.

1. Device/Drug

Not Applicable  Not approved for this indication  Approved  Investigational

2. Device/Drug

Not Applicable  Not approved for this indication  Approved  Investigational

3. Device/Drug

Not Applicable  Not approved for this indication  Approved  Investigational

4. Device/Drug

Not Applicable  Not approved for this indication  Approved  Investigational

5. Device/Drug

Not Applicable  Not approved for this indication  Approved  Investigational

Corresponding Author Name:

Date:
